# Supplementary material for: A simple liquid extraction for simultaneous determination of 12 opioid ligands in plasma by LC-MS/MS
Source: Royal Society of Chemistry journal article supplement (doi:10.1039/d1ay01631h), 2022-01-01
Supplement: d1ay01631h1.pdf [file d1ay01631h1.pdf]

**Table S1:** Mass Spectrometry information for all analytes in this method

| Compounds name       | Precursor Ion | Product Ion | Declustering potential (V) | Collision Energy (V) | Collision Cell Exit Potential (V) |
|----------------------|---------------|-------------|----------------------------|----------------------|-----------------------------------|
| Fentanyl             | 337.2         | 188         | 80                         | 30                   | 10                                |
|                      |               | 105         | 80                         | 46                   | 13                                |
| Fentanyl D5          | 342.3         | 188         | 80                         | 30                   | 10                                |
| Morphine             | 286.2         | 152.1       | 130                        | 85                   | 15                                |
|                      |               | 128         | 130                        | 79                   | 13                                |
| Morphine D3          | 289.3         | 152.1       | 130                        | 81                   | 12                                |
| Buprenorphine        | 468.4         | 396.3       | 60                         | 49                   | 31                                |
|                      |               | 267.2       | 60                         | 62                   | 31                                |
| Buprenorphine D4     | 472.6         | 400.3       | 80                         | 54                   | 39                                |
| Norbuprenorphine     | 414.2         | 187.1       | 176                        | 48                   | 31                                |
|                      |               | 200.1       | 176                        | 43                   | 16                                |
| Norbuprenorphine D3  | 417.3         | 187.2       | 120                        | 54                   | 24                                |
| Oxycodone            | 316.1         | 241.1       | 70                         | 38                   | 22                                |
|                      |               | 256.1       | 70                         | 35                   | 25                                |
| Oxycodone D3         | 319.1         | 241.1       | 70                         | 38                   | 25                                |
| Tapentadol           | 222           | 107.1       | 85                         | 30                   | 12                                |
|                      |               | 121.1       | 85                         | 28                   | 19                                |
| Tapentadol D3        | 225           | 107.1       | 45                         | 22                   | 16                                |
| Naloxone             | 328.2         | 310.2       | 77                         | 27                   | 15                                |
|                      |               | 212.1       | 77                         | 49                   | 5                                 |
| Naloxone D5          | 333.2         | 315.1       | 80                         | 25                   | 19                                |
| Alfentanil           | 417.3         | 197.1       | 40                         | 31                   | 40                                |
|                      |               | 268.2       | 40                         | 27                   | 17                                |
| Alfentanil D3        | 420.2         | 271.3       | 85                         | 23                   | 15                                |
| Norfentanyl          | 233.4         | 84          | 101                        | 24                   | 12                                |
|                      |               | 150.1       | 101                        | 21                   | 18                                |
| Norfentanyl D5       | 238.5         | 84.3        | 101                        | 24                   | 12                                |
| Tramadol             | 264.2         | 58          | 70                         | 42                   | 8                                 |
|                      |               | 42          | 70                         | 123                  | 5                                 |
| Tramadol D3          | 268.2         | 58          | 70                         | 42                   | 8                                 |
| Noroxycodone         | 302.2         | 227.1       | 130                        | 43                   | 33                                |
|                      |               | 284.2       | 130                        | 27                   | 36                                |
| Noroxycodone D3      | 305.4         | 287.2       | 151                        | 25                   | 24                                |
| O desmethyl tramadol | 250.2         | 58          | 45                         | 55                   | 10                                |

|                            |     |      |    |    |    |
|----------------------------|-----|------|----|----|----|
|                            |     | 42.1 | 45 | 70 | 15 |
| O desmethyl tramadol<br>D6 | 256 | 64   | 70 | 50 | 17 |

**Table S2.** Results of Quality Assurance/Quality Control.

|                  | Tapentadol | Norfentanyl | Tramadol   | Morphine    | Noroxycodone | Oxycodone | Naloxone  | Fentanyl    | Norbuprenorphine | Alfentanil | Buprenorphine | O desmethyl tramadol |
|------------------|------------|-------------|------------|-------------|--------------|-----------|-----------|-------------|------------------|------------|---------------|----------------------|
| QC at 0.1 ng/mL  | 0.09±0.01  | 0.09±0.01   | 0.14±0.01  | 0.09±0.02   | #DIV/0!      | 0.08±0.01 | 0.09±0.01 | 0.1±0.01    | nd               | 0.09±0.01  | 0.09±0.03     | 0.1±0.01             |
| QC at 5 ng/mL    | 5.01±0.11  | 4.98±0.05   | 5.11±0.11  | 4.87±0.13   | 5.03±0.05    | 4.96±0.10 | 4.78±0.18 | 5.32±0.12   | 5.16±0.26        | 4.98±0.12  | 5.4±0.10      | 4.92±0.14            |
| QC at 20 ng/mL   | 20.2±0.7   | 21.4±0.8    | 20.6±0.8   | 20.3±1.2    | 20.2±1.0     | 20.6±0.6  | 20.1±1.0  | 21.3±0.7    | 20.2±0.2         | 20.7±0.6   | 22.6±1.0      | 20.4±1.4             |
| Duplicate 1      | nd         | nd          | 22.3±0.09  | nd          | nd           | nd        | nd        | 0.03±0.001  | nd               | nd         | nd            | 1.41±0.04            |
| Duplicate 2      | nd         | nd          | 0.05±0.001 | 0.024±0.004 | nd           | nd        | nd        | 0.11±0.001  | nd               | nd         | nd            | 0.015±0.001          |
| Duplicate 3      | nd         | nd          | 0.08±0.02  | 0.47±0.01   | nd           | nd        | nd        | 0.03±0.001  | nd               | nd         | nd            | 0.02±0.004           |
| Duplicate 4      | nd         | nd          | 0.06±0.005 | nd          | nd           | nd        | nd        | 0.02±0.002  | nd               | nd         | nd            | 0.014±0.001          |
| Duplicate 5      | nd         | nd          | 0.05±0.001 | nd          | nd           | nd        | nd        | 0.071±0.001 | nd               | nd         | nd            | 0.014±0.002          |
| Solvent blank    | nd         | nd          | nd         | nd          | nd           | nd        | nd        | nd          | nd               | nd         | nd            | nd                   |
| Procedural blank | nd         | nd          | 0.47±0.001 | nd          | nd           | nd        | 0.09±0.02 | nd          | nd               | nd         | nd            | 0.014±0.0006         |

## Section S1: QuEChERS method

Firstly, 100  $\mu\text{L}$  of plasma samples were spiked with 100  $\mu\text{L}$  of labeled standards (100  $\mu\text{g}/\text{L}$ ). Secondly, 4800  $\mu\text{L}$  volume of acetonitrile was added to get a final volume at 5 mL. Thirdly, samples were vortexed for 30 seconds and transferred into a QuEChERS kit. Then, samples were vortexed for 30 seconds, shake for 5 minutes and centrifuged at 10625g for 15 minutes. Then the upper level was transferred into a new tube and was put in -20 freezer overnight. On the next day, firstly, we transferred 1ml of ACN containing 0.1% formic acid to a Captiva 3ml non-drip lipid (part number: A5300635) followed by 500 $\mu\text{L}$  of the supernatant then filter into a high recovery screw vial. Then the supernatant was centrifuged for 10 min at 4000 rpm at 4°C and then was filtered into a vial via 13mm PTFE 0.2 $\mu\text{m}$  (part: 5190-5265). Samples were then evaporated to dryness under a gentle stream of nitrogen at 40 °C. The residue was reconstituted with 1000  $\mu\text{L}$  of mobile phase (5% methanol, 95% milliQ water, 0.1% Formic acid) and 200 $\mu\text{L}$  of samples were transferred to analyze.

## Section S2: simplified QuEChERS method

Firstly, 20  $\mu\text{L}$  of plasma samples were spiked with 20  $\mu\text{L}$  of labeled standards (100  $\mu\text{g}/\text{L}$ ). Secondly, an 1960  $\mu\text{L}$  volume of acetonitrile was added to get a final 2ml total volume. Thirdly, samples were vortexed for 15 seconds and centrifuged at 10625g for 15 minutes. Then, the upper level was extracted and transferred into a 2 mL centrifuge tube containing 50 mg of PSA and 100 mg of  $\text{MgSO}_4$ . Samples were vortexed for 60 seconds and centrifuged at 18,000 rpm for 3 min. And then we transferred the supernatant to analyze.
